# Supplementary material for: Expression of the neuroprotective protein aryl hydrocarbon receptor nuclear translocator 2 correlates with neuronal stress and disability in models of multiple sclerosis
Source: Springer Nature journal article supplement (doi:10.1186/s12974-018-1290-6), 2018-09-19

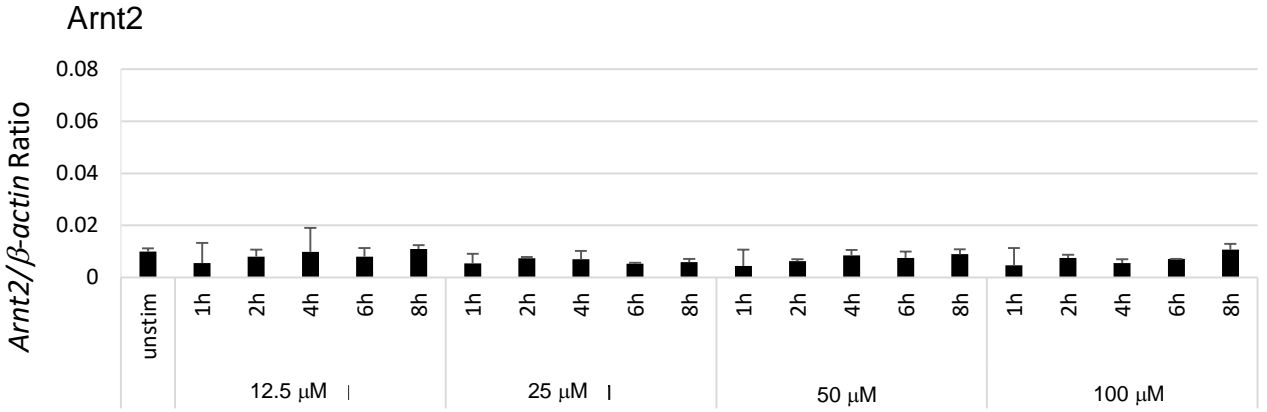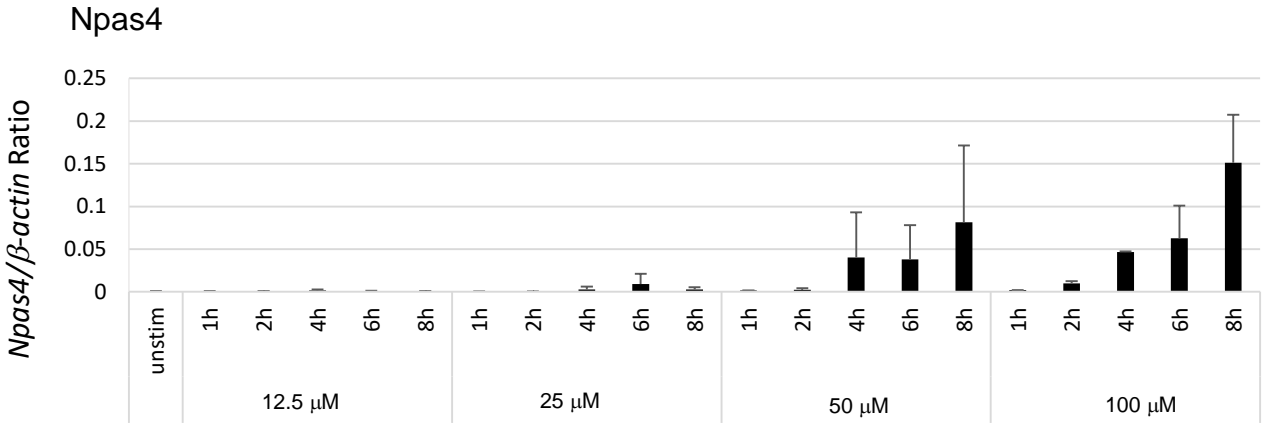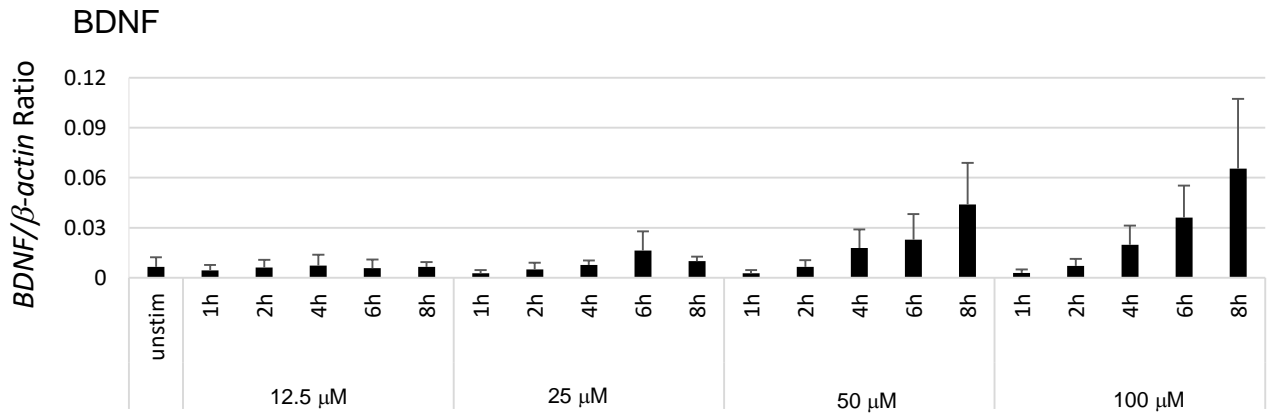

Supplement: MOESM4 [file 16137394]
